# Supplementary material
Source: publisher figshare collection journal article supplement (https://frontiersin.figshare.com/ndownloader/files/17866169)
Supplement: Supplementary file [file 17866169]

**Supplementary Table 1** The continuous flooded or exposure duration (days) of different elevations by the sampling day in both areas.

| Sampling date | Water level (m) | Water flooded (F) or exposed to air (E) when sampling | Flooding or exposure duration (days) |       |       |       |       |       |
|---------------|-----------------|-------------------------------------------------------|--------------------------------------|-------|-------|-------|-------|-------|
|               |                 |                                                       | Reference (175.5 m)                  | 170 m | 165 m | 160 m | 155 m | 150 m |
| 2013.10.10    | 168.6           | F                                                     | Flooding unaffected                  | -     | 21    | 28    | 37    | 60    |
|               |                 | E                                                     |                                      | 252   | -     | -     | -     | -     |
| 2014.4.1      | 161.3           | F                                                     |                                      | -     | -     | 200   | 209   | 232   |
|               |                 | E                                                     |                                      | 70    | 39    | -     | -     | -     |
| 2014.9.23     | 168.5           | F                                                     |                                      | -     | 9     | 22    | 26    | 48    |
|               |                 | E                                                     |                                      | 255   | -     | -     | -     | -     |
| 2015.5.6      | 159.4           | F                                                     |                                      | -     | -     | -     | 251   | 273   |
|               |                 | E                                                     |                                      | 81    | 11    | 2     | -     | -     |

The light and dark grey backgrounds represent recovery group and flooding group samples, respectively.

**Supplementary Table 2** Background and details of anthropogenic disturbance in two study areas.

| Study area | Soil texture | Total grain output (ton year <sup>-1</sup> ) | Poultry population | Agricultural fertilizer                 |                                         |                                         |                                                  | Population density (people km <sup>-2</sup> ) |
|------------|--------------|----------------------------------------------|--------------------|-----------------------------------------|-----------------------------------------|-----------------------------------------|--------------------------------------------------|-----------------------------------------------|
|            |              |                                              |                    | N-fertilizer (kg N year <sup>-1</sup> ) | P-fertilizer (kg P year <sup>-1</sup> ) | K-fertilizer (kg K year <sup>-1</sup> ) | Compound Fertilizer (kg NPK year <sup>-1</sup> ) |                                               |
| AA         | Silt clay    | 284                                          | 615                | 8754.3                                  | 2701.5                                  | 426.8                                   | 4025.5                                           | 485                                           |
| NA         | Silt clay    | 27                                           | 125                | 892.8                                   | 206.4                                   | 38.4                                    | 396.5                                            | 55                                            |

Notes: Data in each area were collected and gathered within 1 km on the basis of the statistical yearbook of Kaixian (Kaixian County Bureau of Statistics 2013 (In Chinese)) and social surveys conducted in 2013.

## REFERENCE

Kaixian County Bureau of Statistics. *Statistical Yearbook of Kaixian County (2012)*. Chongqing, China Kaixian County Annals Editorial Department, 2013 (In Chinese).
